# Supplementary material for: Fabrication of colloidal photonic crystal supraparticles via atomization drying for efficient passive cooling
Source: Royal Society of Chemistry journal article supplement (doi:10.1039/d4tc04838e), 2025-01-01
Supplement: d4tc04838e1.pdf [file d4tc04838e1.pdf]

## Supporting information

### **Fabrication of Colloidal Photonic Crystal Supraparticles by Atomization Drying towards Efficient Passive Cooling**

Jiang Zhai<sup>1</sup>, Nian-Xiang Zhang<sup>1</sup>, Fucheng Li, Chang Liu, Guo-Xing Li, Xiao-Qing  
Yu\*, Qing Li\*, Su Chen

State Key Laboratory of Materials-Oriented Chemical Engineering, College of  
Chemical Engineering, Nanjing Tech University, Nanjing 210009, P. R. China.

\*Corresponding author. Email address: [13625541559@163.com](mailto:13625541559@163.com);  
[liqing1128@njtech.edu.cn](mailto:liqing1128@njtech.edu.cn);

This Supporting Information includes:  
Figure S1 to S8  
Legends for Video S1

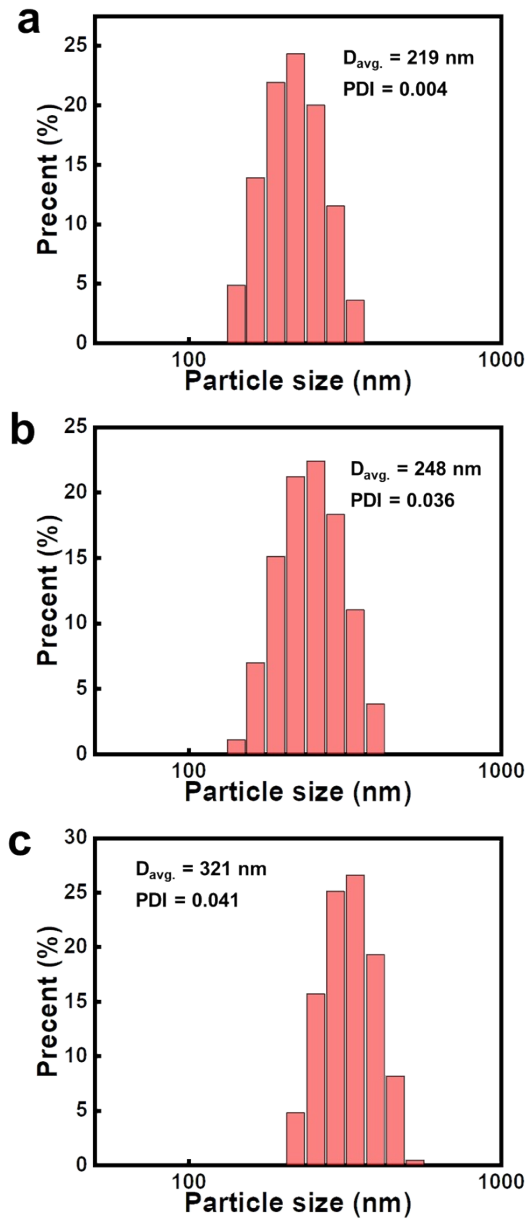

**Figure S1** Particle size distribution of P(MMA-BA-MAA) monodispersed colloidal latex for construction of colloidal photonic crystal (CPC) supraparticles.

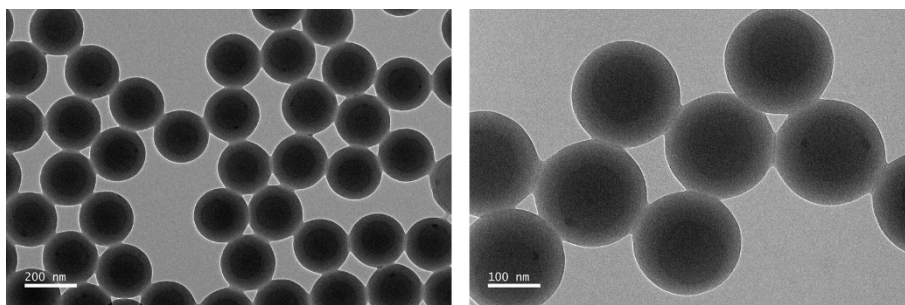

**Figure S2** Transmission electron microscopy (TEM) images of P(MMA-BA-MAA) monodispersed colloidal particles.

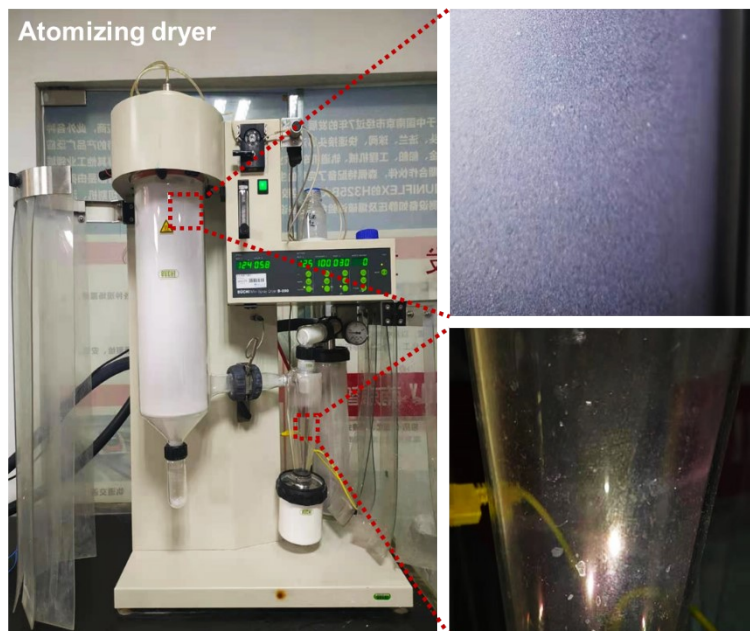

**Figure S3** Setup of microfluidic atomizing dryer, which can consecutively and efficiently assemble CPC supraparticles from monodispersed colloidal latex.

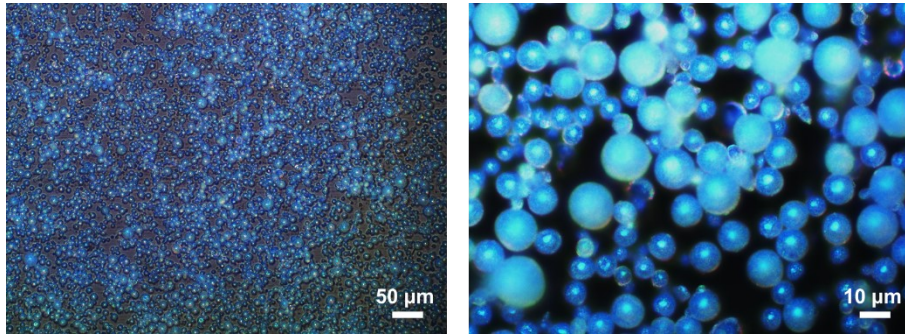

**Figure S4** Optical microphotographs of CPC supraparticles.

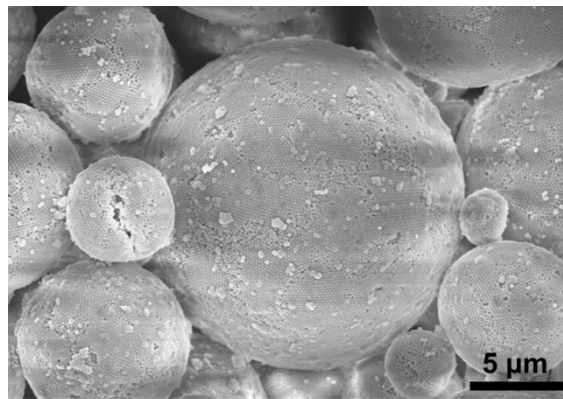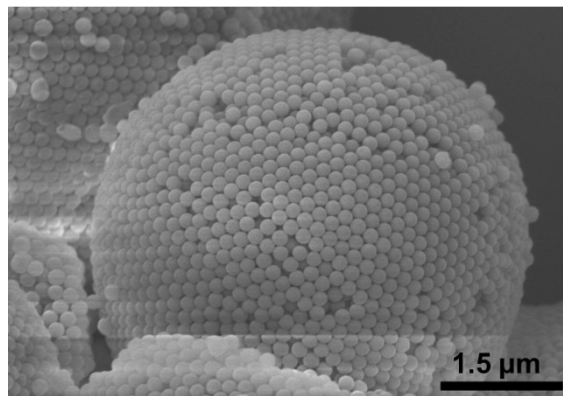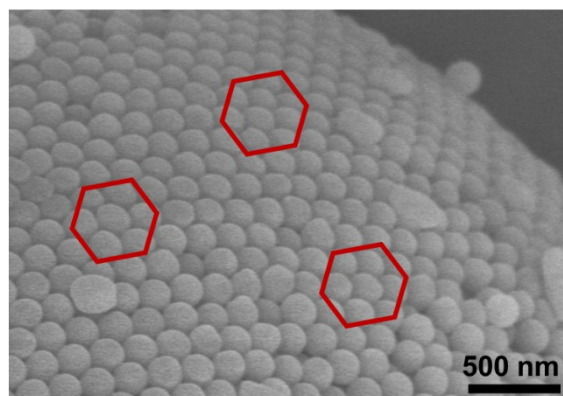

**Figure S5** Representative scanning electron microscope (SEM) images of the obtained CPC supraparticles under different magnifications.

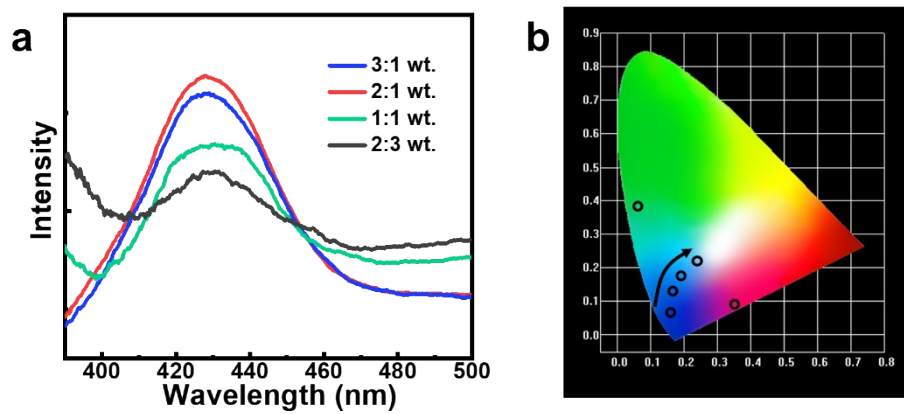

**Figure S6** (a) Reflectance spectra of organogel composite CPC films with PDMS gel/supraparticle mass ratios varying from 3:1 to 2:3. (b) Coherent infrared energy (CIE) chromaticity coordinates for the structural colors of organogel composite CPC films.

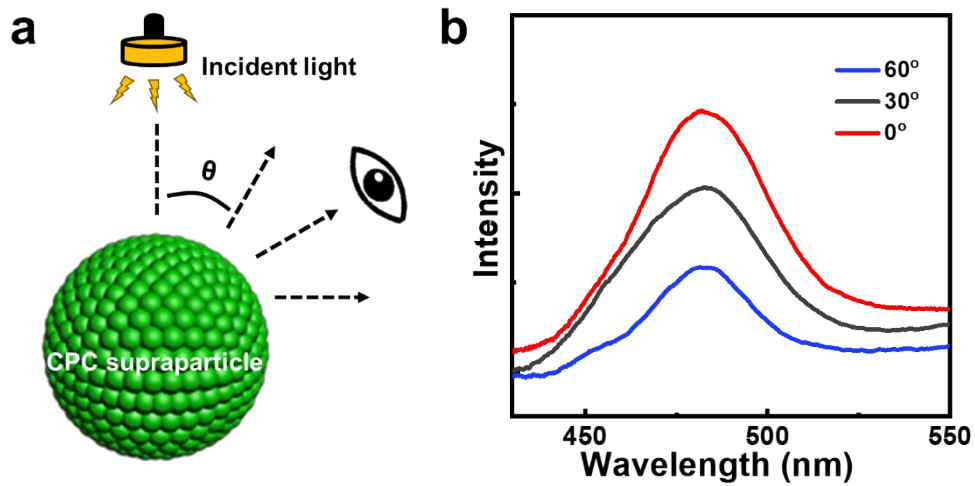

**Figure S7** (a) Schematic diagram of the CPC supraparticle with spherically symmetric structure, indicating the angle-independent optical property. (b) Reflectance spectra of the organogel composite CPC film (blue structural color) at different detection angle to the incident light.



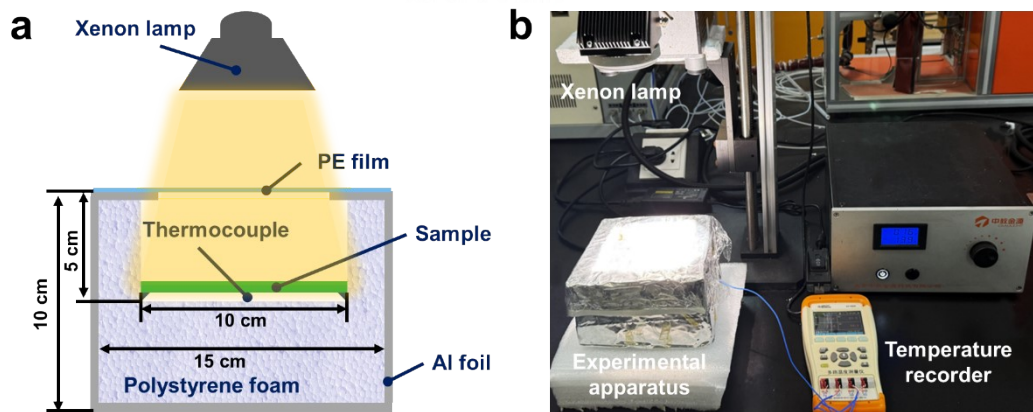

**Figure S8** (a) Schematic and (b) digital photographs of the indoor experimental apparatus used to characterize the cooling performance.

**Video S1** Washing resistance test of the organogel composite CPC film.
